# Supplementary material for: Use of the Ion PGM and the GeneReader NGS Systems in Daily Routine Practice for Advanced Lung Adenocarcinoma Patients: A Practical Point of View Reporting a Comparative Study and Assessment of 90 Patients
Source: PubMed Central journal article supplement (PMC5923343; doi:10.3390/cancers10040088), 2018-03-21
Supplement: cancers-10-00088-s001.pdf [file cancers-10-00088-s001.pdf]

# Use of the Ion PGM and the GeneReader NGS systems in daily routine practice for advanced lung adenocarcinoma patients. A practical point of view reporting a comparative study and assessment of 90 patients

Simon Heeke, Véronique Hofman, Elodie Long-Mira, Virginie Lespinet, Salomé Lalvée, Olivier Bordone, Camille Ribeyre, Virginie Tanga, Jonathan Benzaquen, Sylvie Leroy, Charlotte Cohen, Jérôme Mouroux, Charles Hugo Marquette, Marius Ilié and Paul Hofman

## Supplementary Material

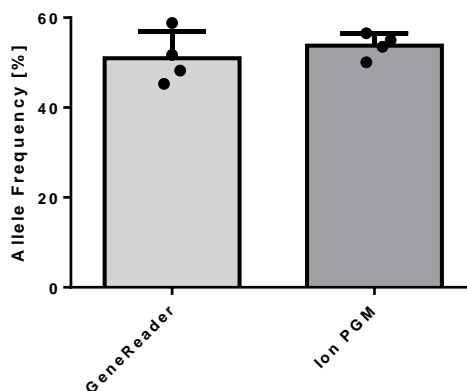

**Figure S1.** For one Sample, DNA Isolation and Sequencing was repeated 4 times. Allele Frequency of the KRAS p.Q61H mutation after repeated sequencing using the GeneReader and Ion PGM was determined to assess reproducibility of the assay.

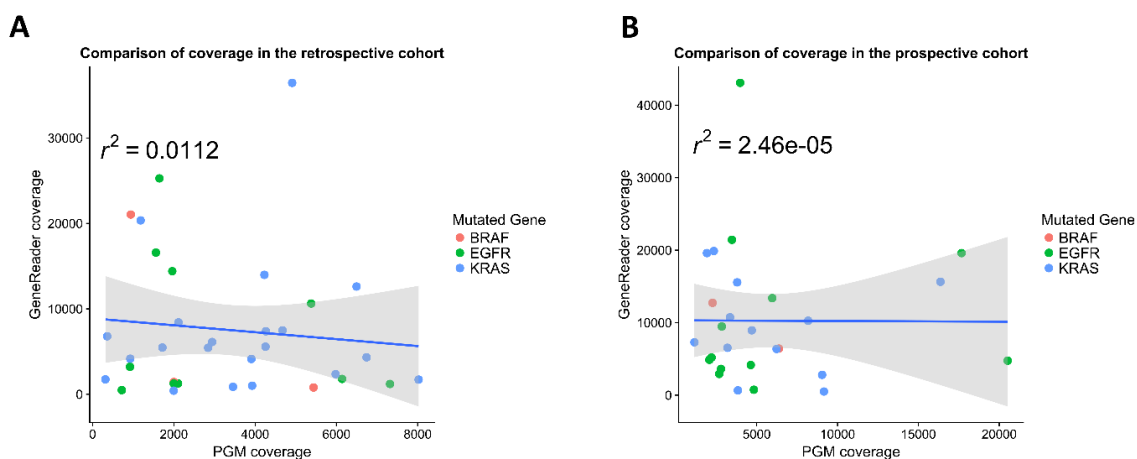

**Figure S2.** Comparison of the coverage between the GeneReader and the PGM in the **A** retrospective and the **B** prospective cohort. Coverage at the site of the mutation in the PGM is plotted against the coverage at the site of mutation for the GeneReader. The Pearson's correlation is indicated on the graphs. The 95% confidence interval is represented as hatched grey areas. Different mutations are represented in different colored dots as mentioned on the graph.

Table S1. Description of patient cohort.

| Prospective Cohort |                                    |                     |                        |                                           |
|--------------------|------------------------------------|---------------------|------------------------|-------------------------------------------|
| Patient            | Tumor sample origin                | Sample Preservation | Tumor cell content [%] | Mutation                                  |
| 1                  | Bronchoscopic biopsy               | FFPE                | 40                     | No Mutation detected                      |
| 2                  | Biopsy under video mediastinoscopy | FFPE                | 70                     | <i>EGFR</i> p.E746_A750del                |
| 3                  | Surgical Specimen                  | FFPE                | 80                     | No Mutation detected                      |
| 4                  | Thoracoscopic biopsy               | FFPE                | 60                     | <i>EGFR</i> p.A767_V769dup                |
| 5                  | Surgical Specimen                  | FFPE                | 80                     | <i>EGFR</i> p.L858R                       |
| 6                  | Surgical Specimen                  | FFPE                | 80                     | <i>EGFR</i> p.L861Q / <i>EGFR</i> p.V774M |
| 7                  | Bronchoscopic biopsy               | FFPE                | 20                     | <i>BRAF</i> p.G469A                       |
| 8                  | Surgical Specimen                  | FFPE                | 80                     | <i>EGFR</i> p.E746_A750del                |
| 9                  | Surgical Specimen                  | FFPE                | 90                     | <i>BRAF</i> p.V600E                       |
| 10                 | Surgical Specimen                  | FFPE                | 10                     | <i>KRAS</i> p.G12D                        |
| 11                 | Surgical Specimen                  | FFPE                | 60                     | No Mutation detected                      |
| 12                 | Surgical Specimen                  | FFPE                | 40                     | No Mutation detected                      |
| 13                 | Surgical Specimen                  | FFPE                | 50                     | <i>KRAS</i> p.G12V                        |
| 14                 | Surgical Specimen                  | FFPE                | 90                     | <i>KRAS</i> p.G12C                        |
| 15                 | Surgical Specimen                  | FFPE                | 30                     | <i>KRAS</i> p.G12D                        |
| 16                 | Surgical Specimen                  | FFPE                | 70                     | <i>KRAS</i> p.G12D                        |
| 17                 | Surgical Specimen                  | FFPE                | 50                     | <i>KRAS</i> p.G12V                        |
| 18                 | Surgical Specimen                  | FFPE                | 90                     | <i>KRAS</i> p.G12C                        |
| 19                 | Surgical Specimen                  | FFPE                | 80                     | <i>KRAS</i> p.G12C                        |
| 20                 | Surgical Specimen                  | FFPE                | 90                     | <i>KRAS</i> p.G12C                        |
| 21                 | Surgical Specimen                  | FFPE                | 60                     | <i>EGFR</i> p.L858R / <i>EGFR</i> p.G719C |
| 22                 | Surgical Specimen                  | FFPE                | 70                     | <i>EGFR</i> p.L858R                       |
| 23                 | Surgical Specimen                  | FFPE                | 70                     | <i>KRAS</i> p.G12C                        |
| 24                 | Surgical Specimen                  | FFPE                | 80                     | No Mutation detected                      |
| 25                 | Surgical Specimen                  | FFPE                | 70                     | <i>EGFR</i> p.E746_A750del                |
| 26                 | Surgical Specimen                  | FFPE                | 80                     | <i>KRAS</i> p.G12C                        |
| 27                 | Surgical Specimen                  | FFPE                | 30                     | <i>EGFR</i> p.L858R                       |
| 28                 | Surgical Specimen                  | FFPE                | 60                     | <i>EGFR</i> p.E746_A750del                |
| 29                 | Surgical Specimen                  | FFPE                | 80                     | <i>KRAS</i> p.G12C                        |
| 30                 | Thoracoscopic biopsy               | FFPE                | 20                     | <i>KRAS</i> p.G12D                        |

| Retrospective Cohort |                                    |                     |                        |                      |
|----------------------|------------------------------------|---------------------|------------------------|----------------------|
| Patient              | Tumor sample origine               | Sample Preservation | Tumor cell content [%] | Mutation             |
| 1                    | Biopsy under video mediastinoscopy | frozen              | 50                     | <i>KRAS</i> p.G12A   |
| 2                    | Surgical Specimen                  | frozen              | 30                     | No Mutation detected |
| 3                    | Surgical Specimen                  | frozen              | 50                     | No Mutation detected |
| 4                    | Thoracoscopic biopsy               | FFPE                | 30                     | <i>EGFR</i> p.L858R  |

|    |                                    |        |    |                                                           |
|----|------------------------------------|--------|----|-----------------------------------------------------------|
| 5  | Surgical Specimen                  | frozen | 60 | <i>KRAS</i> p.A146T                                       |
| 6  | Surgical Specimen                  | frozen | 60 | No Mutation detected                                      |
| 7  | Surgical Specimen                  | FFPE   | 30 | <i>EGFR</i> p.G719A                                       |
| 8  | Biopsy under video mediastinoscopy | FFPE   | 60 | <i>BRAF</i> p.V600E                                       |
| 9  | Thoracoscopic biopsy               | FFPE   | 20 | No Mutation detected                                      |
| 10 | Surgical Specimen                  | frozen | 70 | No Mutation detected                                      |
| 11 | Fine needle biopsy                 | FFPE   | 70 | <i>EGFR</i> p.L858R                                       |
| 12 | Thoracoscopic biopsy               | FFPE   | 40 | <i>KRAS</i> p.G12D<br>(library preparation failed on PGM) |
| 13 | Surgical Specimen                  | FFPE   | 60 | <i>KRAS</i> p.G12C                                        |
| 14 | Surgical Specimen                  | FFPE   | 60 | No Mutation detected                                      |
| 15 | Biopsy under video mediastinoscopy | FFPE   | 50 | <i>KRAS</i> p.G12C                                        |
| 16 | Fine needle biopsy                 | FFPE   | 20 | No Mutation detected                                      |
| 17 | Biopsy under video mediastinoscopy | FFPE   | 50 | No Mutation detected                                      |
| 18 | Biopsy under video mediastinoscopy | FFPE   | 20 | <i>KRAS</i> p.G12V                                        |
| 19 | Surgical Specimen                  | frozen | 80 | No Mutation detected                                      |
| 20 | Surgical Specimen                  | FFPE   | 40 | No Mutation detected                                      |
| 21 | Surgical Specimen                  | FFPE   | 50 | No Mutation detected                                      |
| 22 | Surgical Specimen                  | FFPE   | 20 | No Mutation detected                                      |
| 23 | Surgical Specimen                  | FFPE   | 80 | <i>EGFR</i> E746_A750del                                  |
| 24 | Surgical Specimen                  | FFPE   | 40 | <i>KRAS</i> p.G12C                                        |
| 25 | Biopsy under video mediastinoscopy | FFPE   | 30 | No Mutation detected                                      |
| 26 | Thoracoscopic biopsy               | FFPE   | 80 | <i>BRAF</i> p.V600E                                       |
| 27 | Surgical Specimen                  | FFPE   | 70 | <i>EGFR</i> p.S768I                                       |
| 28 | Fine needle biopsy                 | FFPE   | 70 | No Mutation detected                                      |
| 29 | Surgical Specimen                  | FFPE   | 90 | <i>BRAF</i> p.G469A                                       |
| 30 | Bronchoscopic biopsy               | FFPE   | 20 | No Mutation detected                                      |
| 31 | Bronchoscopic biopsy               | FFPE   | 20 | <i>EGFR</i> p.E746_A750del                                |
| 32 | Bronchoscopic biopsy               | FFPE   | 80 | <i>EGFR</i> p.E746_A750del                                |
| 33 | Surgical Specimen                  | FFPE   | 15 | No Mutation detected                                      |
| 34 | Biopsy under video mediastinoscopy | FFPE   | 50 | No Mutation detected                                      |
| 35 | Surgical Specimen                  | FFPE   | 70 | No Mutation detected                                      |
| 36 | Surgical Specimen                  | FFPE   | 30 | No Mutation detected                                      |
| 37 | Surgical Specimen                  | FFPE   | 30 | No Mutation detected                                      |
| 38 | Bronchoscopic biopsy               | frozen | 40 | <i>KRAS</i> p.G12C                                        |
| 39 | Biopsy under video mediastinoscopy | FFPE   | 80 | <i>KRAS</i> p.G12D                                        |
| 40 | Surgical Specimen                  | FFPE   | 80 | <i>KRAS</i> p.Q61H                                        |
| 41 | Biopsy under video mediastinoscopy | frozen | 70 | <i>KRAS</i> p.G13C                                        |
| 42 | Surgical Specimen                  | FFPE   | 30 | No Mutation detected                                      |

|    |                                    |        |    |                                                               |
|----|------------------------------------|--------|----|---------------------------------------------------------------|
| 43 | Biopsy under video mediastinoscopy | FFPE   | 50 | No Mutation detected                                          |
| 44 | Surgical Specimen                  | FFPE   | 40 | KRAS p.G12C                                                   |
| 45 | Bronchoscopic biopsy               | FFPE   | 50 | KRAS p.G12V                                                   |
| 46 | Bronchoscopic biopsy               | FFPE   | 30 | KRAS p.G12A                                                   |
| 47 | Surgical Specimen                  | FFPE   | 70 | EGFR p.E746_T751>A                                            |
| 48 | Thoracoscopic biopsy               | frozen | 30 | KRAS p.G12C                                                   |
| 49 | Surgical Specimen                  | FFPE   | 90 | No Mutation detected                                          |
| 50 | Surgical Specimen                  | FFPE   | 50 | EGFR p.E746_E751del / KRAS p.G12D                             |
| 51 | Surgical Specimen                  | frozen | 50 | No Mutation detected                                          |
| 52 | Surgical Specimen                  | FFPE   | 60 | No Mutation detected                                          |
| 53 | Surgical Specimen                  | FFPE   | 70 | KRAS p.G13C                                                   |
| 54 | Surgical Specimen                  | FFPE   | 90 | KRAS p.Q61H                                                   |
| 55 | Biopsy under video mediastinoscopy | FFPE   | 70 | KRAS p.G12C                                                   |
| 56 | Biopsy under video mediastinoscopy | FFPE   | 90 | KRAS p.G12C                                                   |
| 57 | Surgical Specimen                  | frozen | 50 | EGFR p.L747_T751                                              |
| 58 | Bronchoscopic biopsy               | FFPE   | 10 | KRAS p.G12V                                                   |
| 59 | Surgical Specimen                  | FFPE   | 80 | KRAS p.G12V                                                   |
| 60 | Bronchoscopic biopsy               | FFPE   | 30 | EGFR p.L747_A750>P (library preparation failed on GeneReader) |

**Table S2:** Comparison of detected alterations between the two sequencing systems by type of alteration

| Alteration        | Ion PGM mutations | GeneReader mutations | False positives | False negatives |
|-------------------|-------------------|----------------------|-----------------|-----------------|
| Missense Mutation | 50                | 50                   | 0               | 0               |
| Deletion          | 9                 | 9                    | 0               | 0               |
| Complex Deletion  | 1                 | 1                    | 0               | 0               |
| Insertion         | 1                 | 1                    | 0               | 0               |
